# Supplementary material
Source: publisher figshare collection journal article supplement (https://future-science-group.figshare.com/ndownloader/files/31128850)
Supplement: Supplementary file 1 [file 31128850]

Supplemental Table 2. Full list of Impacts Endorsed during Patient Interviews

| **Patient Endorsed Impact Concepts** | | | | | | | | |
| --- | --- | --- | --- | --- | --- | --- | --- | --- |
|  |  | |  | |  | |  | |
| ***nmCRPC/mHSPC*** |  | |  | |  | |  | |
| **Activities of Daily Lives** | | **Physical Functioning** | | **Emotional/Psychological Functioning** | | **Financial** | | **Social Functioning** |
| Daily and/or physical activities | | Difficulty standing | | Anxiety | | Finance | | Family |
| Work | | Difficulty walking | | Calm | | Insurance coverage | | Relationship |
|  | | Loss of strength | | Embarrassed | |  | |  |
|  | | Sleep/rest | | Fear | |  | |  |
|  | |  | | Feelings about self | |  | |  |
|  | |  | | Feeling excluded | |  | |  |
|  | |  | | Feeling helpless | |  | |  |
|  | |  | | Frustration | |  | |  |
|  | |  | | Indifferent | |  | |  |
|  | |  | | Patient's desire for more effective treatment | |  | |  |
|  | |  | | Planning for the future | |  | |  |
|  | |  | | Shock | |  | |  |
|  | |  | | Stress | |  | |  |
|  | |  | | Upset | |  | |  |
|  | |  | | Worry | |  | |  |
| ***Metastatic CRPC*** | |  | |  | |  | |  |
| **Activities of Daily Lives** | | **Physical Functioning** | | **Emotional/Psychological Functioning** | | **Financial** | | **Social Functioning** |
| Adjustments to living arrangements | | Inability to squat | | Coping - adult diapers | | Finance | | Family |
| Caregiver assistance | | Climb stairs | | Coping - initial diagnosis | | Financial burden | | Relationships |
| Daily and/or physical activities | | Diet | | Coping - self care | | Insurance coverage | |  |
| Elderly daycare | | Difficulty sitting | | Coping - support from family | |  | |  |
| SRE - daily function | | Difficulty standing | | Coping - support from friends | |  | |  |
| Work | | Difficulty swallowing | | Family reaction | |  | |  |
|  | | Loss of appetite | | Feelings about self | |  | |  |
|  | | Loss of interest | | Felt defeated | |  | |  |
|  | | Loss of sleep | | Indifferent | |  | |  |
|  | | Loss of strength | | Losing motivation | |  | |  |
|  | | Difficulty walking | | Planning for future | |  | |  |
|  | |  | | Planning for death | |  | |  |
|  | |  | | Relief | |  | |  |
|  | |  | | Shock/Surprise | |  | |  |
|  | |  | | Stress/Anxiety | |  | |  |
|  | |  | | Stigma around illness | |  | |  |
|  | |  | | Talk less | |  | |  |
|  | |  | | Worry | |  | |  |
